# Supplementary material for: Atomic Co–N4 and Co nanoparticles confined in COF@ZIF-67 derived core–shell carbon frameworks: bifunctional non-precious metal catalysts toward the ORR and HER
Source: Royal Society of Chemistry journal article supplement (doi:10.1039/d1ta08325b), 2021-11-24
Supplement: d1ta08325b1.pdf [file d1ta08325b1.pdf]

**Atomic Co-N<sub>4</sub> and Co nanoparticles confined in COF@ZIF-67 derived  
core-shell carbon frameworks: Bifunctional non-precious metal  
catalysts toward ORR and HER**

Minghao Liu,<sup>ab</sup> Qing Xu,<sup>ac\*</sup> Qiyang Miao,<sup>ad</sup> Shuai Yang,<sup>e</sup> Ping Wu,<sup>ab</sup> Guojuan Liu,<sup>ab</sup> Jun He,<sup>b</sup> Chengbing Yu,<sup>d\*</sup> and Gaofeng Zeng <sup>ac\*</sup>

## Experimental section

**Materials:** 2-Methylimidazole were purchased from Aladdin. 2,4,6-Trihydroxybenzene-1,3,5-tricarbaldehyde (TP) and 2,2'-bipyridine-5,5'-diamine (BPY) were purchased from Alfa. Cobalt nitrate hexahydrate, methanol (MeOH), tetrahydrofuran (THF), ethanol (EtOH) and potassium hydroxide (KOH) were from Sinopharm Chemical Reagent Co.,Ltd.

**Catalyst preparation:** In a typical synthesis of ZIF-67, 4 mmol 2-methylimidazole and 1 mmol cobalt nitrate hexahydrate were dissolved in 25 mL MeOH, respectively, which were mixed and stirred at 25 °C for 24 hours to obtain purple solid. The ZIF-67 solid was washed with MeOH and THF in sequence and then dried in vacuum. For the synthesis of COF@ZIF, 63 mg of TP in 50 mL THF and 83.7 mg of BPY in 50 mL THF were added into the mixture of ZIF-67 (500 mg) and THF (200 mL), which were then sonicated for 30 minutes and stirred at 25 °C for 24 hours to obtain ZIF-67-supported TP-BPY-COF (named as COF@ZIF). The collected COF@ZIF was washed with MeOH and THF in sequence and then dried in vacuum with the yield of 81% TP-BPY-COF. The as-prepared ZIF-67 and COF@ZIF were heated to 800 °C with a rate of 5 °C min<sup>-1</sup> and kept for 1 hour in N<sub>2</sub> to yield ZIF<sub>800</sub> and COF@ZIF<sub>800</sub>, respectively.

**Electrochemical performance tests:** The COF@ZIF<sub>800</sub> catalyst (5 mg) was ultrasonic dispersed in a Nafion ethanol solution (0.25 wt.%, 500 μL) for 2 h to yield a homogeneous ink. The catalyst ink (12 μL) was pipetted onto a glassy carbon electrode ( $d = 5.00$  mm,  $S = 0.196$  cm<sup>2</sup>) with a loading amount of 0.6 mg cm<sup>-2</sup>. The commercial Pt/C catalyst (20 wt.% platinum on carbon black, BASF) was employed as a reference. The Pt/C catalyst ink and electrode were prepared by the same conditions to that of COF@ZIF<sub>800</sub>. All the electrochemical measurements were conducted in a conventional three-electrode cell using the electrochemical workstation (Pine Research Instrumentation, USA) at room temperature. The Ag/AgCl (3 M KCl) and platinum wire were used as reference and counter electrodes, respectively. A rotating ring disk electrode (RRDE) with a Pt ring and a glassy carbon disk served as the substrate for the working electrode for evaluating the ORR activity and selectivity of various catalysts. The electrochemical experiments were conducted in O<sub>2</sub> saturated aqueous solution of KOH (0.1 M) for ORR and in N<sub>2</sub> saturated aqueous solution of KOH (1.0 M) for HER, respectively. The RRDE measurements were conducted at a rotation rate of 1600 rpm with a sweep rate of 10 mV s<sup>-1</sup>. On the basis of ring and disk currents, the electron-transfer number ( $n$ ) and four-electron selectivity of catalysts based on the H<sub>2</sub>O<sub>2</sub> yield (H<sub>2</sub>O<sub>2</sub> %) were calculated from the equations of  $n = 4 I_D / (I_R / N) + I_D$  and  $H_2O_2 \% = 200 (I_R / N) / (I_R / N) + I_D$ , where  $I_D$  and  $I_R$  are the disk and ring currents, respectively, and the ring collection efficiency  $N$  is 0.37. The Tafel slope was estimated by linear fitting of the polarization curves according to the Tafel equation ( $\ln j = b \times \log j + a$ , where  $j$  is the current density and  $b$  is the Tafel slope). For the cyclic voltammetry (CV) tests, the potential range was circularly scanned between 0.15 and 1.1 V at a scan rate of 50 mV s<sup>-1</sup> after purging O<sub>2</sub> gas for 30 min. To estimate the double layer capacitance, the electrolyte was deaerated by bubbling with nitrogen, and then the voltammogram was evaluated again in the deaerated electrolyte.

**Characterization:** Powder X-ray diffraction (PXRD) data were recorded on an Ultima IV diffractometer with Cu K $\alpha$  radiation by depositing powder on glass substrate, from  $2\theta = 1.5^\circ$  up to  $60^\circ$  with  $0.02^\circ$  increment. Nitrogen sorption isotherms were measured at 77 K with a TriStar II, Micromeritics. The Brunauer-Emmett-Teller (BET) method was utilized to calculate the specific surface areas. By using the non-local density functional theory (NLDFT) model, the pore volume was derived from the sorption curve. X-ray photoelectron spectroscopy (XPS) measurements were carried out on a Thermo Scientific K-Alpha XPS spectrometer using Al K $\alpha$  X-ray source for radiation. Raman spectra were obtained from a Bruker SEN TERRA spectrometer employing a semiconductor laser ( $\lambda = 532$  nm). High-resolution transmission electron microscope images were obtained by transmission electron microscopy (TEM, FEI Tecnai G2) installed with energy dispersive spectrometer (EDS, Oxford). The morphology was measured by a scanning electron microscope (SEM, Zeiss SUPRA 55 SAPPHIRE).

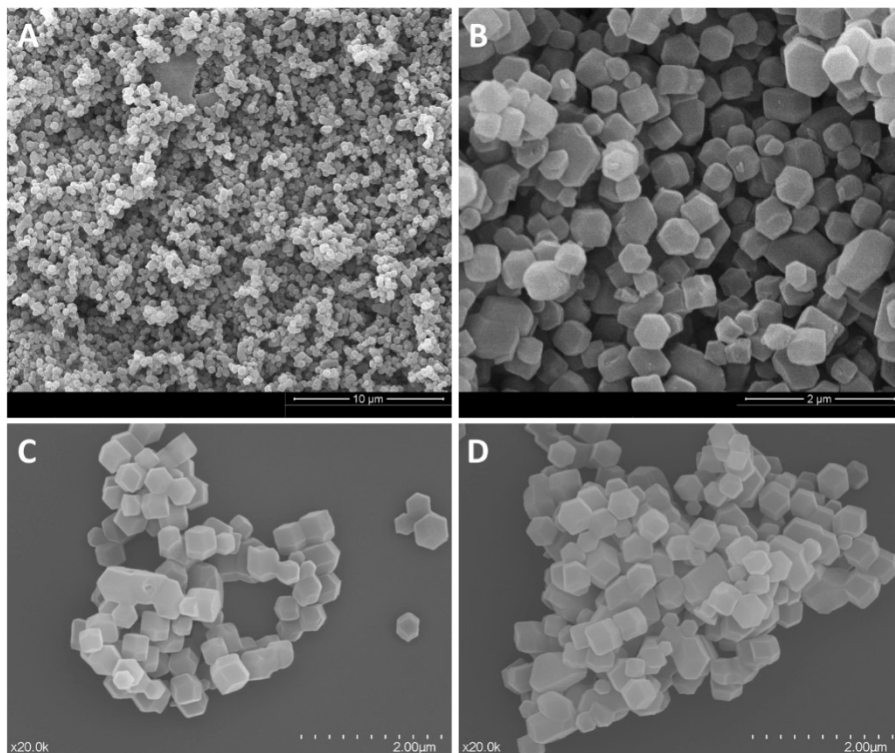

Figure S1. SEM images of ZIF-67.

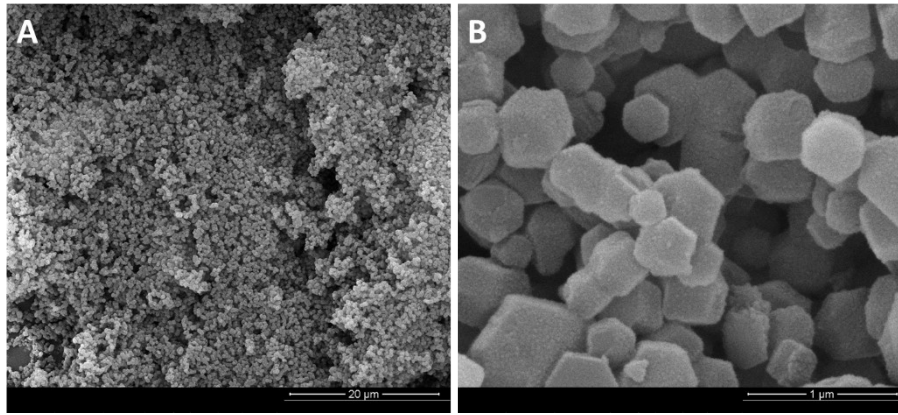

Figure S2. SEM images of COF@ZIF.

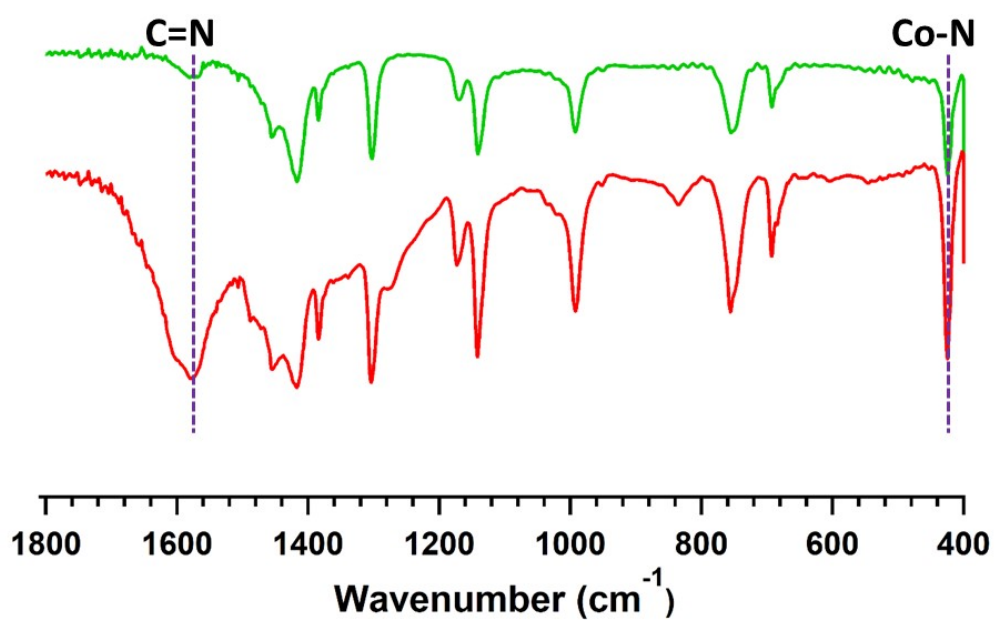

Figure S3. FT IR spectra of ZIF-67 (green) and COF@ZIF (red).

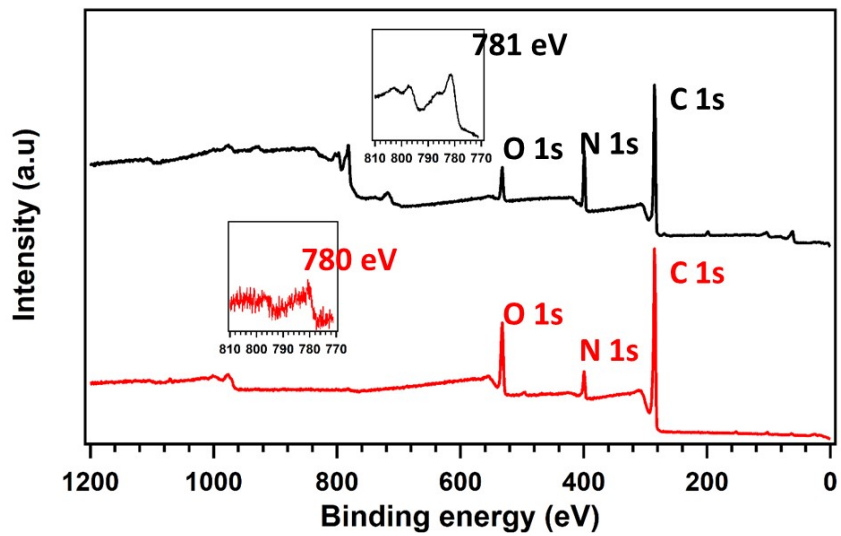

Figure S4. XPS spectra of ZIF-67 and COF@ZIF.

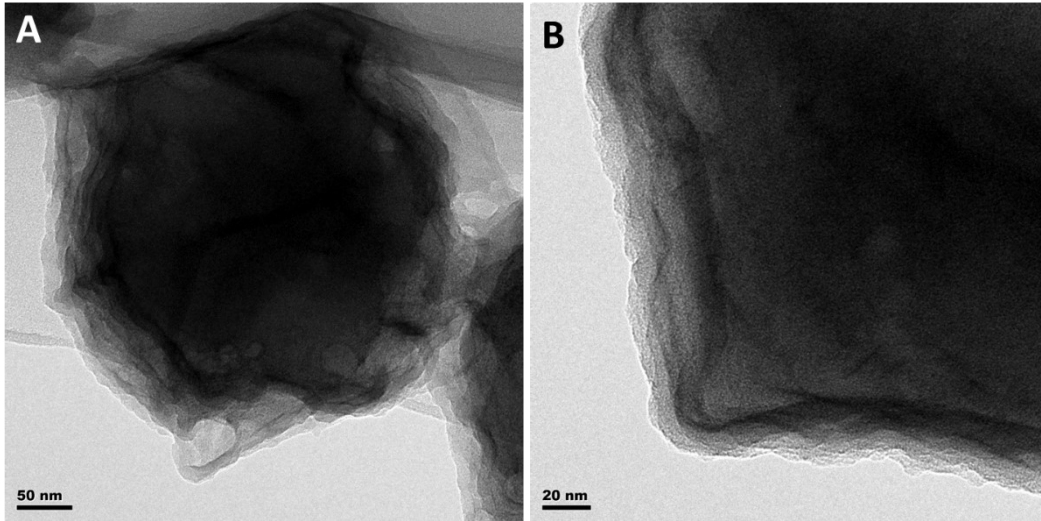

Figure S5. TEM images of COF@ZIF.



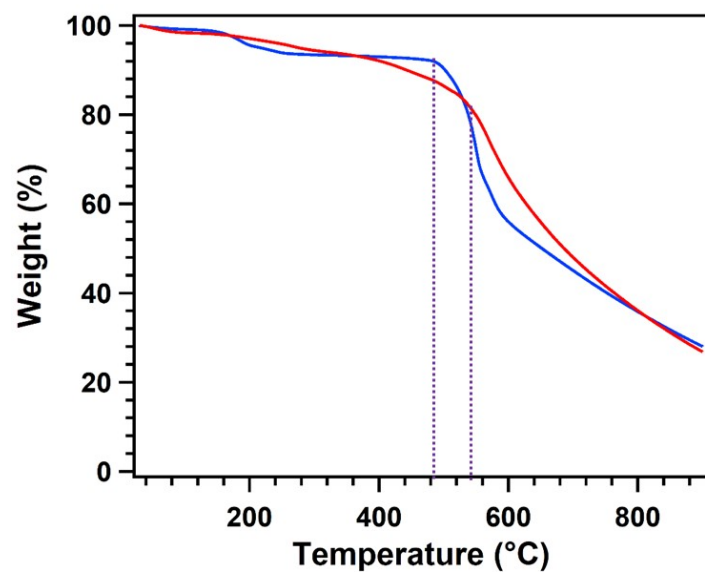

Figure S6. TGA profiles for ZIF-67 (blue curves) and COF@ZIF (red curve) from 25 to 900 °C under N<sub>2</sub>.

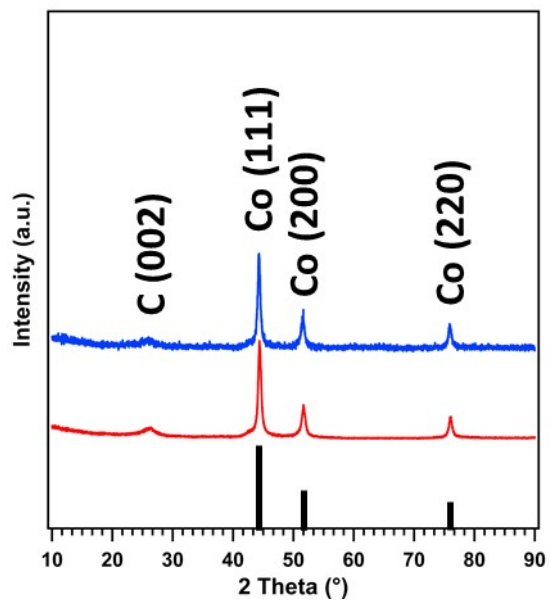

Figure S7. PXRD patterns of ZIF<sub>800</sub> (blue), COF@ZIF<sub>800</sub> (red) and the standard of Co (black, PDF#15-0806).

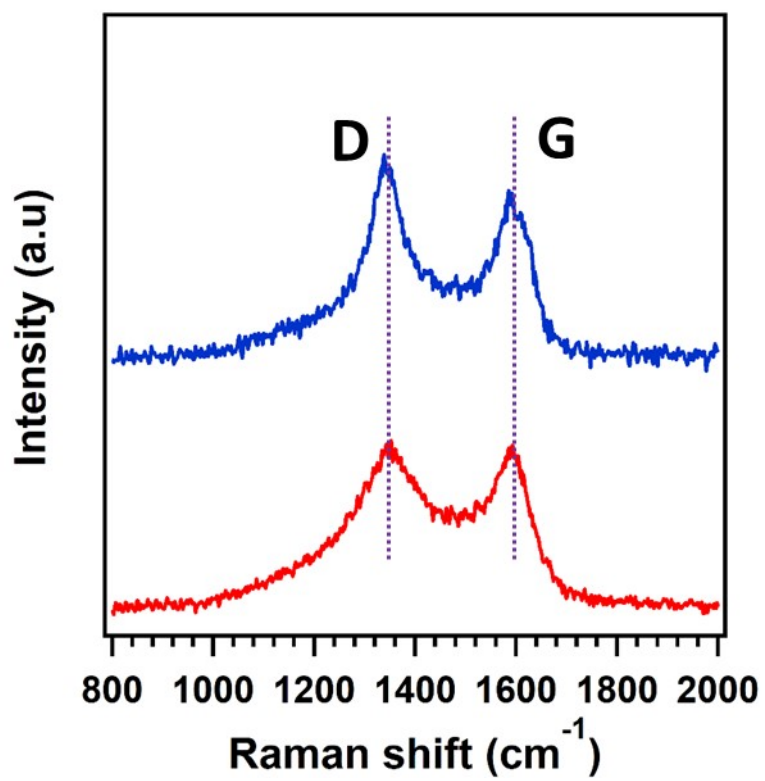

Figure S8. Raman spectra of ZIF<sub>800</sub> (blue) and COF@ZIF<sub>800</sub> (red).

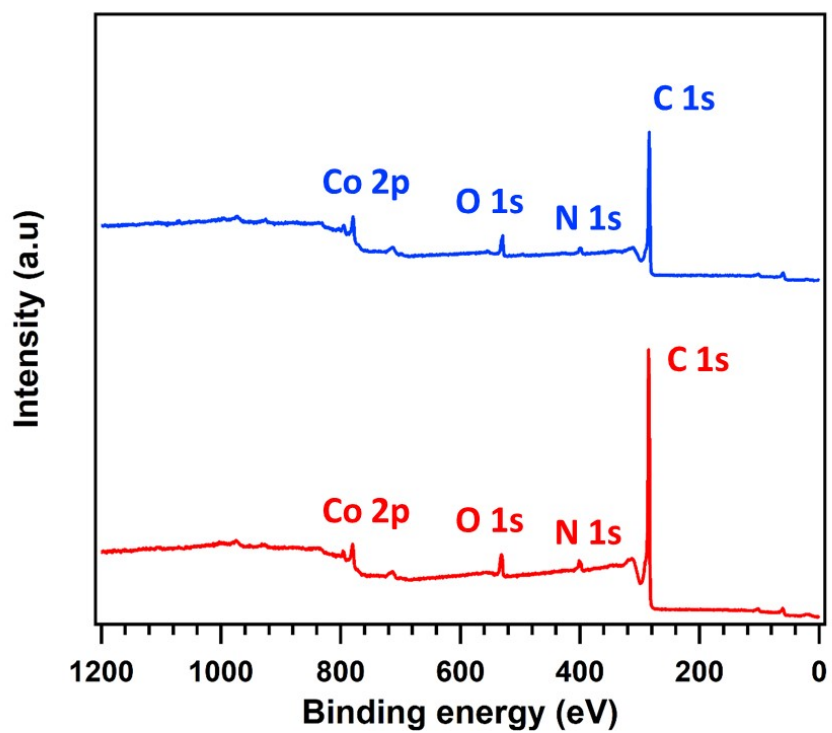

Figure S9. XPS spectra of ZIF<sub>800</sub> (blue curve) and COF@ZIF<sub>800</sub> (red curve).

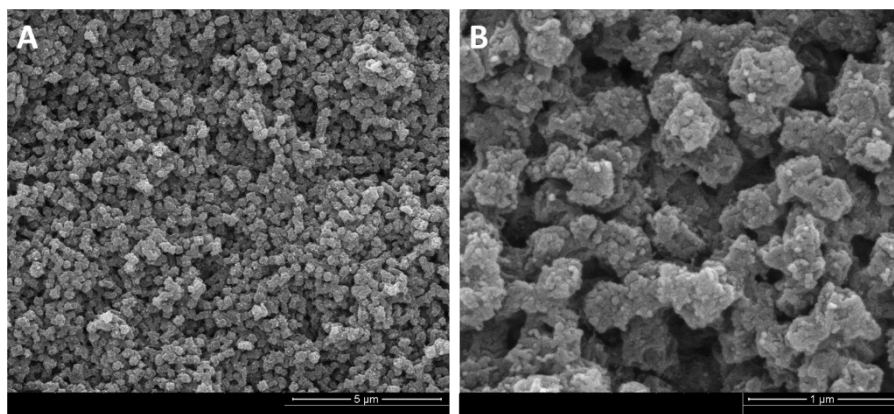

Figure S10. SEM images of ZIF<sub>800</sub>.

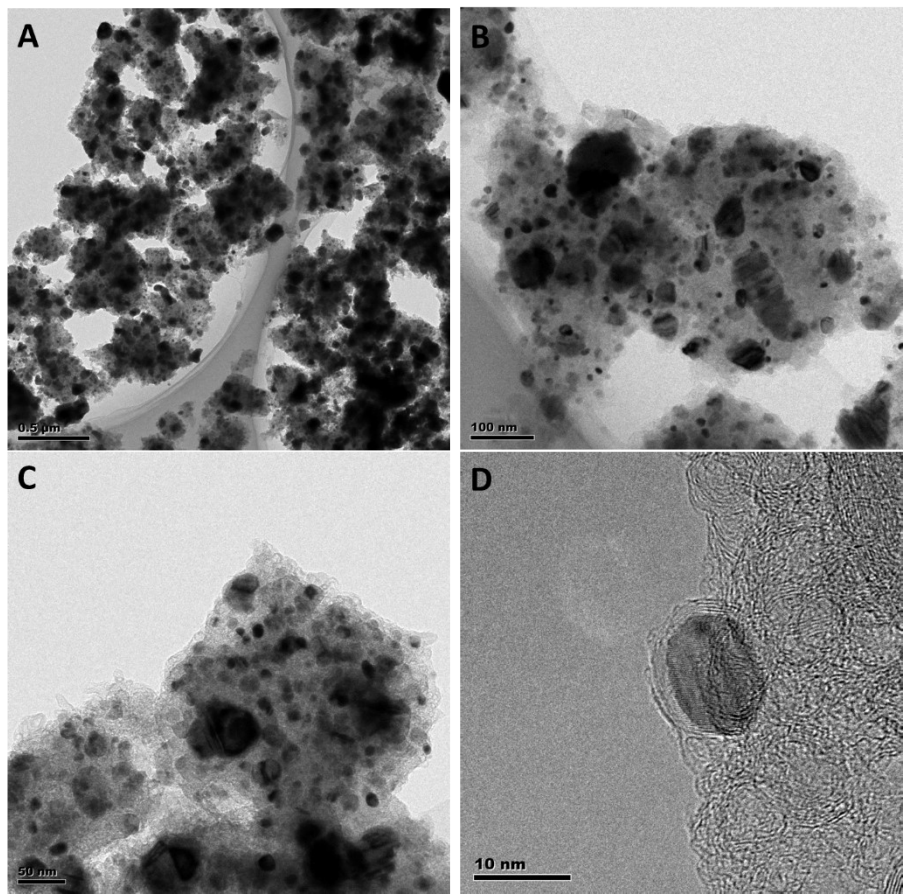

Figure S11. TEM images of ZIF<sub>800</sub>.

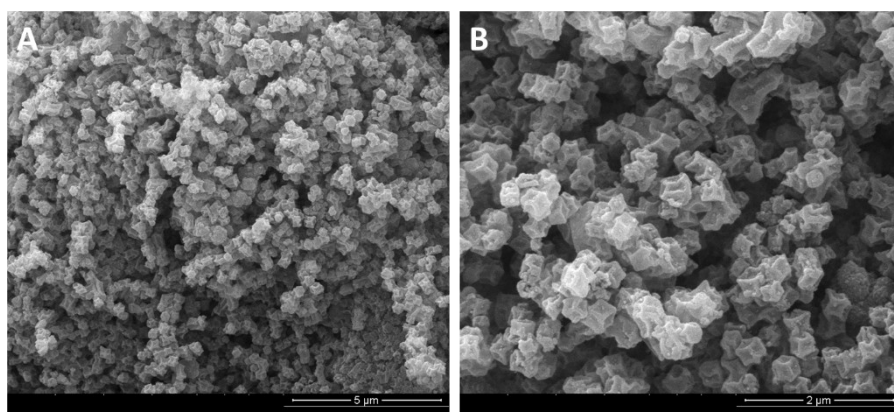

Figure S12. SEM images of COF@ZIF<sub>800</sub>.

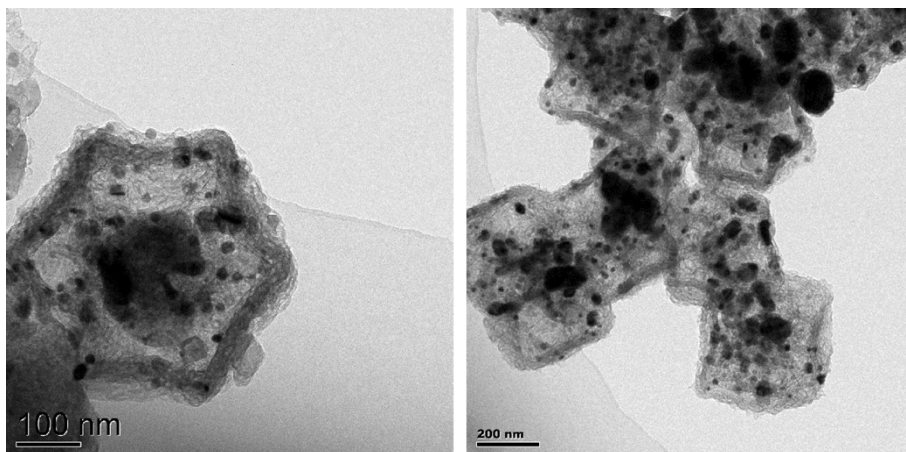

Figure S13. TEM images of COF@ZIF<sub>800</sub>.



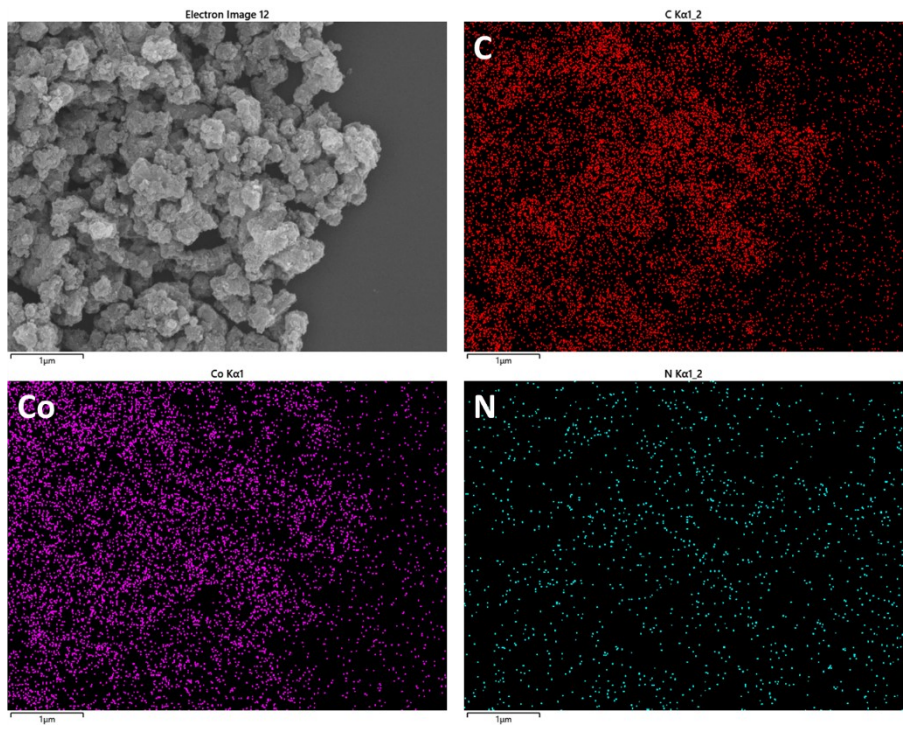

Figure S14. EDX mapping of ZIF<sub>800</sub>.

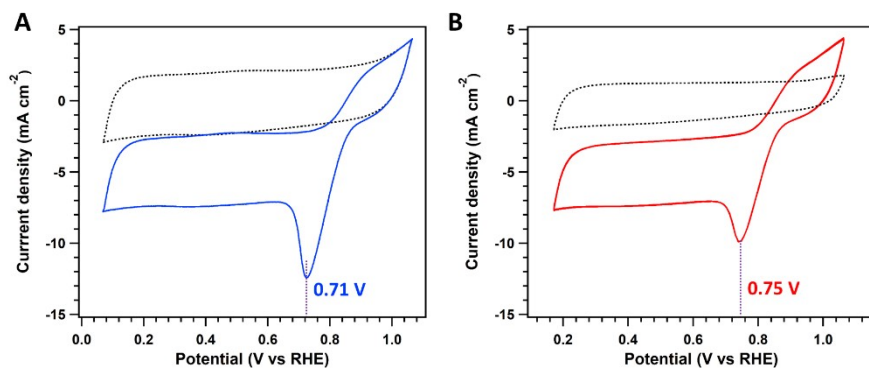

Figure S15. CV curves of ZIF<sub>800</sub> (A) and COF@ZIF<sub>800</sub> (B).

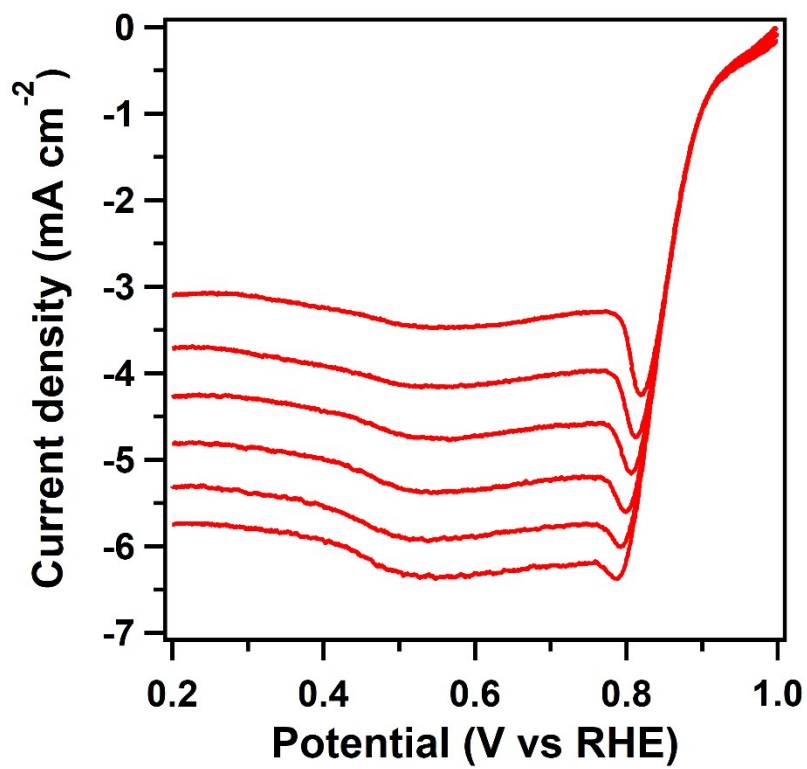

Figure S16. LSV curves for COF@ZIF<sub>800</sub> at different scan rate.

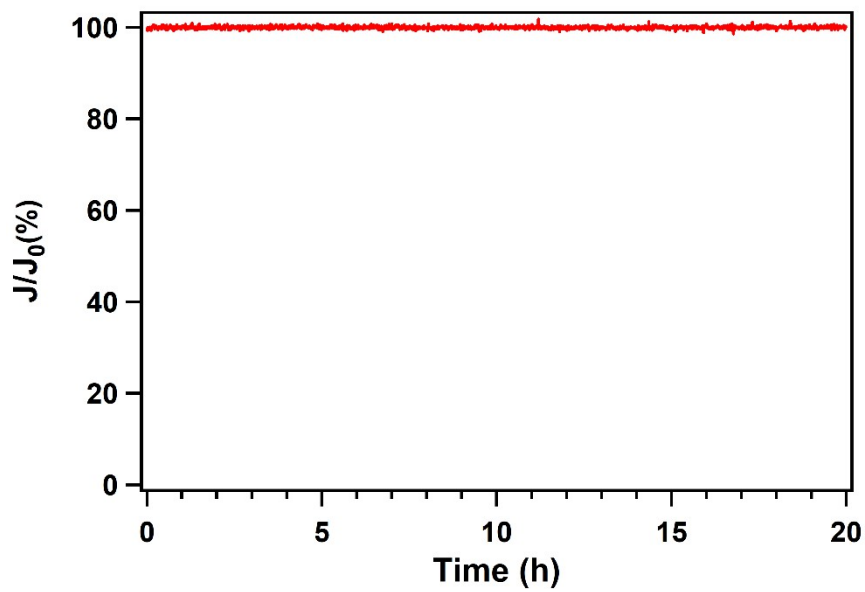

Figure S17. Long-term stability test of COF@ZIF<sub>800</sub> at 0.6 V vs RHE for 20 h.

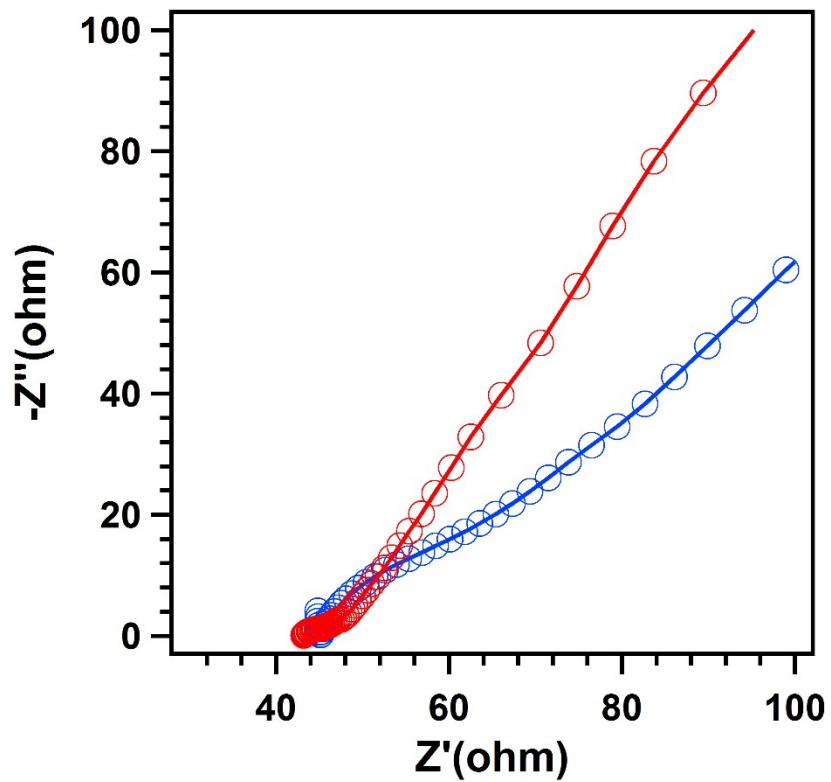

Figure S18. The EIS plots for COF@ZIF<sub>800</sub> (red curves) and ZIF<sub>800</sub> (black curves).

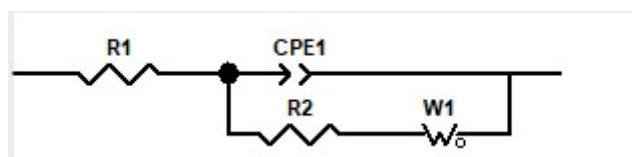

Figure S19. The diagram of EIS simulation circuit for COF@ZIF<sub>800</sub> and ZIF<sub>800</sub>.

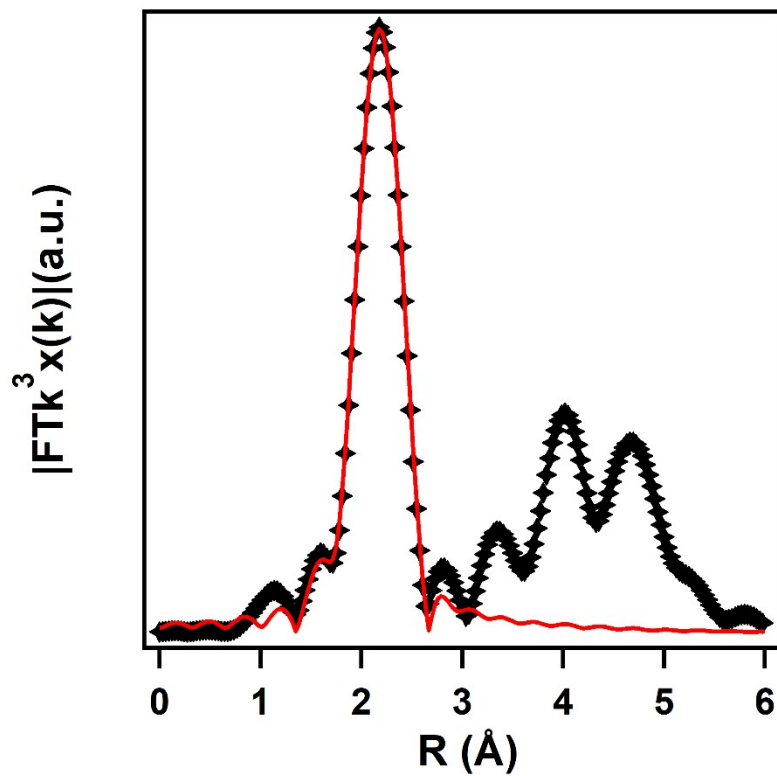

Figure S20. EXAFS fitting curve for Co in COF@ZIF<sub>800</sub>.

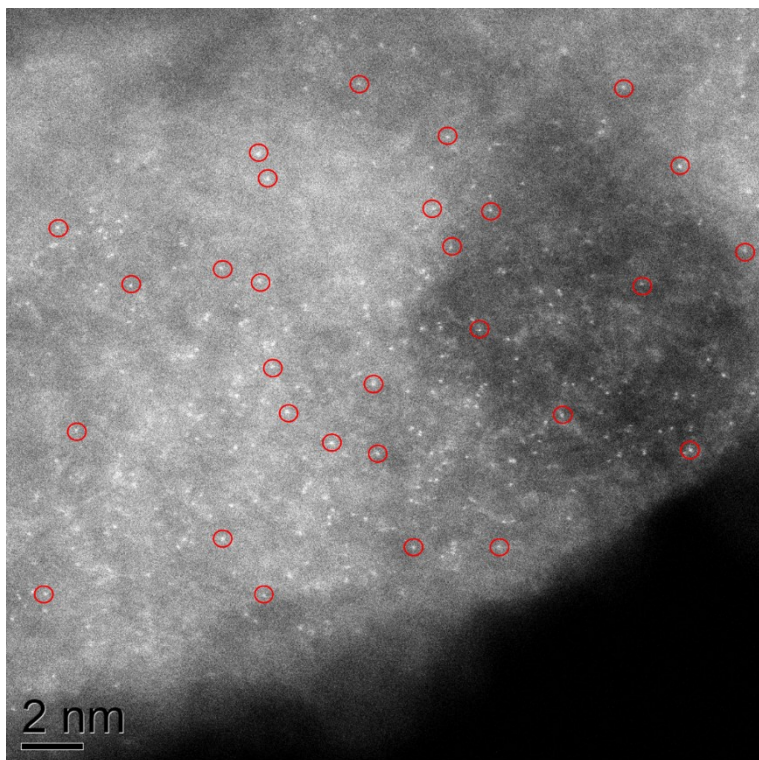

Figure S21. High-resolution HAADF-STEM images of COF@ZIF<sub>800</sub>.



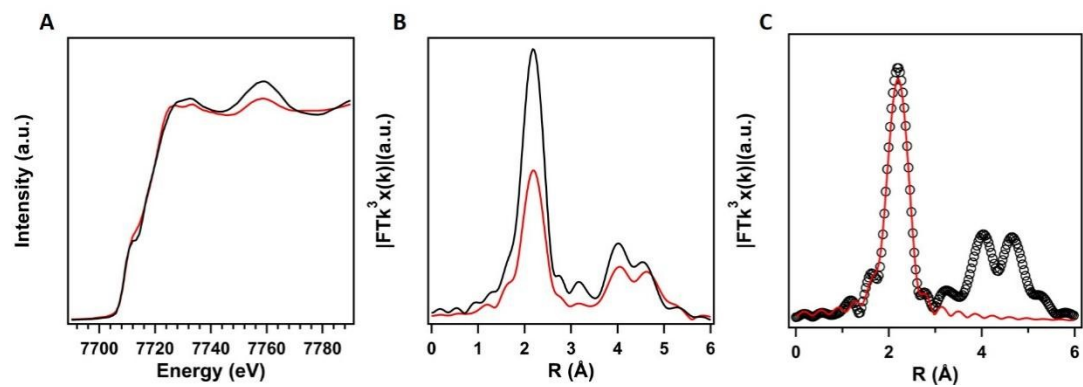

Figure S22. (A) X-ray absorption near-edge structure (XANES) spectra and (B) Fourier transformed  $k^3$ -weighted  $\chi(k)$ -function of the EXAFS spectra for ZIF<sub>800</sub> (red) and Co foil (black) K-edge. (C) EXAFS fitting curve for Co in ZIF<sub>800</sub>.

### 3. Tables

Table S1. Summary of electrocatalysts for ORR in 0.1 M KOH.

| Catalysts                                | $E_{\text{onset}}$<br>(V vs. RHE) | $E_{1/2}$<br>(V vs. RHE) | Tafel slope<br>(mV dec <sup>-1</sup> ) | Ref.             |
|------------------------------------------|-----------------------------------|--------------------------|----------------------------------------|------------------|
| <b>COF@ZIF<sub>800</sub></b>             | <b>0.99</b>                       | <b>0.85</b>              | <b>44</b>                              | <b>This work</b> |
| Co-NC@600                                | 0.94                              | 0.83                     | 66.5                                   | 1                |
| Co <sub>2</sub> P/CoN-NCNTs              | 0.96                              | 0.85                     | 49                                     | 2                |
| CoTBrPP@bio-C                            | 0.93                              | 0.85                     | 55                                     | 3                |
| Co-NC@CC                                 | 0.94                              | 0.81                     | 76                                     | 4                |
| Co-N <sub>3</sub> C <sub>1</sub> @GC     | 0.904                             | 0.824                    | 46                                     | 5                |
| GC@COF-NC <sub>0.08</sub>                | 0.923                             | 0.841                    | 78.4                                   | 6                |
| W <sub>2</sub> N/WC                      | 0.93                              | 0.81                     | 58.13                                  | 7                |
| FeP/Fe <sub>2</sub> O <sub>3</sub> @NPCA | 0.95                              | 0.838                    | 88                                     | 8                |
| Co/N-C(PA)                               | 0.95                              | 0.845                    | 63                                     | 9                |
| Co-SAs@NC                                | 0.96                              | 0.82                     | -                                      | 10               |
| CAN-Pc(Fe/Co)                            | 0.95                              | 0.84                     | 54                                     | 11               |
| L-CCNTs-Co-800                           | 0.90                              | 0.84                     | 54                                     | 12               |
| CoNi@NCNT/NF                             | 0.97                              | 0.87                     | -                                      | 13               |
| CoO <sub>x</sub> NPs/BNG                 | 0.95                              | 0.805                    | 57                                     | 14               |
| Co-C <sub>3</sub> N <sub>4</sub> /CNT    | 0.90                              | 0.85                     | 68.4                                   | 15               |
| cal-CoZIF-VXC72                          | 0.92                              | 0.84                     | 45                                     | 16               |

Table S2. The kinetic current densities ( $J_{kin}$ ) for COF@ZIF<sub>800</sub> and Pt/C at different potentials in 0.1 M KOH.

| Catalysts              | $J_{kin}$ at 0.9 V | $J_{kin}$ at 0.85 V | $J_{kin}$ at 0.8 V |
|------------------------|--------------------|---------------------|--------------------|
| COF@ZIF <sub>800</sub> | 0.96               | 3.01                | 10.56              |
| Pt/C                   | 0.91               | 2.56                | 7.18               |

Table S3. Summary of electrocatalysts for HER in 1 M KOH.

| Catalysts                                              | Overpotential<br>@ $J_{10}$ / mV | Tafel slope<br>(mV dec <sup>-1</sup> ) | Ref.             |
|--------------------------------------------------------|----------------------------------|----------------------------------------|------------------|
| <b>COF@ZIF<sub>800</sub></b>                           | <b>159</b>                       | <b>92</b>                              | <b>This work</b> |
| CoTBrPP@bio-C                                          | 220                              | 80                                     | 3                |
| C-CoP                                                  | 173                              | 71.1                                   | 17               |
| Co- Fe-B-P                                             | 173                              | 96                                     | 18               |
| Cu <sub>0.3</sub> Co <sub>2.7</sub> P/NC               | 220                              | 122                                    | 19               |
| FeP NPs@NPC                                            | 214                              | 82                                     | 20               |
| W <sub>2</sub> N/WC                                    | 148.5                            | 47.4                                   | 7                |
| O-Co <sub>2</sub> P                                    | 160                              | 61.1                                   | 21               |
| NiCoP/rGO                                              | 209                              | 124                                    | 22               |
| Co/CoP                                                 | 253                              | 78.8                                   | 23               |
| CoP/CC                                                 | 209                              | 129                                    | 24               |
| Co-Ni <sub>3</sub> N                                   | 194                              | 150                                    | 25               |
| Hollow Co <sub>3</sub> O <sub>4</sub> Microtube Arrays | 190                              | 90                                     | 26               |
| Cu <sub>0.3</sub> Co <sub>2.7</sub> /NC-ZIFs           | 220                              | 122                                    | 27               |
| Co <sub>9</sub> S <sub>8</sub> @NOSC                   | 320                              | 105                                    | 28               |
| Co <sub>0.85</sub> Se/NiFe-LDH                         | 320                              | 160                                    | 29               |
| NiCo <sub>2</sub> S <sub>4</sub> NW/NF                 | 210                              | 50.9                                   | 30               |

Table S4. Co K-edge fitting parameters.

| Sample                 | shell | N   | R (Å) | $\Delta E_0$ (eV) | $\sigma^2(10^{-3}\text{Å}^2)$ | R-factor |
|------------------------|-------|-----|-------|-------------------|-------------------------------|----------|
| Co-foil                | Co-Co | 12  | 2.49  | 8.4               | 6.3                           | 0.001    |
| COF@ZIF <sub>800</sub> | Co-N  | 0.7 | 2.10  | 14.3              | 6.8                           | 0.004    |
|                        | Co-Co | 8.4 | 2.49  | 8.7               | 6.4                           |          |
| ZIF <sub>800</sub>     | Co-Co | 8.5 | 2.50  | 8.5               | 7.8                           | 0.006    |

N, coordination numbers; R, the internal atomic distance;  $\sigma^2$ , Debye-Waller factor;  $\Delta E_0$ , the edge-energy shift.

Table S5. The relevant parameters about EIS simulation circuit for COF@ZIF<sub>800</sub> and ZIF<sub>800</sub>.

| COF@ZIF <sub>800</sub> | Element | Value    | ZIF <sub>800</sub> | Element | Value      |
|------------------------|---------|----------|--------------------|---------|------------|
|                        | R1      | 42.28    |                    | R1      | 43.2       |
|                        | CPE1-T  | 0.000271 |                    | CPE1-T  | 0.00041283 |
|                        | CPE1-P  | 0.28783  |                    | CPE1-P  | 0.5657     |
|                        | R2      | 42.18    |                    | R2      | 83.2       |
|                        | W1-R    | 378.1    |                    | W1-R    | 2313       |
|                        | W1-T    | 2.031    |                    | W1-T    | 0.24422    |
|                        | W1-P    | 0.55611  |                    | W1-P    | 0.5968     |

## References

1. S. Roy, S. Mari, M.K. Sai, S.C. Sarma, S. Sarkar, S.C. Peter, *Nanoscale*, 2020, **12**, 22718-22734.
2. Y. Guo, P. Yuan, J. Zhang, H. Xia, F. Cheng, M. Zhou, J. Li, Y. Qiao, S. Mu, Q. Xu, *Adv. Funct. Mater.*, 2018, **28**, 1805641.
3. X. Lv, Y. Chen, Y. Wu, H. Wang, X. Wang, C. Wei, Z. Xiao, G. Yang, J. Jiang, *J. Mater. Chem. A*, 2019, **7**, 27089-27098.
4. Y. Zhong, Y. Lu, Z. Pan, J. Yang, G. Du, J. Chen, Q. Zhang, H. Zhou, J. Wang, C. Wang, W. Li, *Adv. Funct. Mater.*, 2021, **31**, 2009853.
5. X. Hai, X. Zhao, N. Guo, C. Yao, C. Chen, W. Liu, Y. Du, H. Yan, J. Li, Z. Chen, X. Li, Z. Li, H. Xu, P. Lyu, J. Zhang, M. Lin, C. Su, S.J. Pennycook, C. Zhang, S. Xi, J. Lu, *ACS Catal.*, 2020, **10**, 5862-5870.
6. S. Zhang, W. Xia, Q. Yang, Y. Valentino Kaneti, X. Xu, S.M. Alshehri, T. Ahamad, M.S.A. Hossain, J. Na, J. Tang, Y. Yamauchi, *Chem. Eng. J.*, 2020, **396**, 125154.
7. J. Diao, Y. Qiu, S. Liu, W. Wang, K. Chen, H. Li, W. Yuan, Y. Qu, X. Guo, *Adv. Mater.*, 2020, **32**, 1905679.
8. K. Wu, L. Zhang, Y. Yuan, L. Zhong, Z. Chen, X. Chi, H. Lu, Z. Chen, R. Zou, T. Li, C. Jiang, Y. Chen, X. Peng, J. Lu, *Adv. Mater.*, 2020, **32**, 2002292.
9. J. Du, G. Wu, K. Liang, J. Yang, Y. Zhang, Y. Lin, X. Zheng, Z.Q. Yu, Y. Wu, X. Hong, *Small*, 2021, **17**, 2007264.
10. X. Han, X. Ling, Y. Wang, T. Ma, C. Zhong, W. Hu, Y. Deng, *Angew. Chem. Int. Ed.*, 2019, **58**, 5359-5364.
11. S. Yang, Y. Yu, M. Dou, Z. Zhang, L. Dai, F. Wang, *Angew. Chem. Int. Ed.*, 2019, **58**, 14724-14730.
12. Z. Liang, X. Fan, H. Lei, J. Qi, Y. Li, J. Gao, M. Huo, H. Yuan, W. Zhang, H. Lin, H. Zheng, R. Cao, *Angew. Chem. Int. Ed.*, 2018, **57**, 13187-13191.
13. W. Niu, S. Pakhira, K. Marcus, Z. Li, J.L. Mendoza-Cortes, Y. Yang, *Adv. Energy Mater.*, 2018, **8**, 1800480.
14. Y. Tong, P. Chen, T. Zhou, K. Xu, W. Chu, C. Wu, Y. Xie, *Angew. Chem. Int. Ed.*, 2017, **56**, 7121-7125.
15. Y. Zheng, Y. Jiao, Y. Zhu, Q. Cai, A. Vasileff, L.H. Li, Y. Han, Y. Chen, S.Z. Qiao, *J. Am. Chem. Soc.*, 2017, **139**, 3336-3339.
16. B. Ni, C. Ouyang, X. Xu, J. Zhuang, X. Wang, *Adv. Mater.*, 2017, **29**, 1701354.
17. W. Li, G. Cheng, M. Sun, Z. Wu, G. Liu, D. Su, B. Lan, S. Mai, L. Chen, L. Yu, *Nanoscale*, 2019, **11**, 17084-17092.
18. Z. Wu, D. Nie, M. Song, T. Jiao, G. Fu, X. Liu, *Nanoscale*, 2019, **11**, 7506-7512.
19. J. Song, C. Zhu, B.Z. Xu, S. Fu, M.H. Engelhard, R. Ye, D. Du, S.P. Beckman, Y. Lin, *Adv. Energy Mater.*, 2017, **7**, 1601555.
20. Z. Pu, I.S. Amiinu, C. Zhang, M. Wang, Z. Kou, S. Mu, *Nanoscale*, 2017, **9**, 3555-3560.
21. K. Xu, H. Ding, M. Zhang, M. Chen, Z. Hao, L. Zhang, C. Wu, Y. Xie, *Adv. Mater.*, 2017, **29**, 1606980.
22. J. Li, M. Yan, X. Zhou, Z.-Q. Huang, Z. Xia, C.R. Chang, Y. Ma, Y. Qu, *Adv. Funct. Mater.*, 2016, **26**, 6785-6796.

23. Z.H. Xue, H. Su, Q.Y. Yu, B. Zhang, H.H. Wang, X.-H. Li, J.S. Chen, *Adv. Energy Mater.*, 2017, **7**, 1602355.
24. J. Tian, Q. Liu, A.M. Asiri, X. Sun, *J. Am. Chem. Soc.*, 2014, **136**, 7587-7590.
25. C. Zhu, A.L. Wang, W. Xiao, D. Chao, X. Zhang, N.H. Tiep, S. Chen, J. Kang, X. Wang, J. Ding, J. Wang, H. Zhang, H.J. Fan, *Adv. Mater.*, 2018, **30**, e1705516.
26. Y.P. Zhu, T.Y. Ma, M. Jaroniec, S.Z. Qiao, *Angew. Chem., Int. Ed.*, 2017, **56**, 1324-1328.
27. J. Song, C. Zhu, B.Z. Xu, S. Fu, M.H. Engelhard, R. Ye, D. Du, S.P. Beckman, Y. Lin, *Adv. Energy Mater.*, 2017, **7**, 1601555.
28. S. Huang, Y. Meng, S. He, A. Goswami, Q. Wu, J. Li, S. Tong, T. Asefa, M. Wu, *Adv. Funct. Mater.*, 2017, **27**, 1606585.
29. Y. Hou, M.R. Lohe, J. Zhang, S. Liu, X. Zhuang, X. Feng, *Energy Environ. Sci.*, 2016, **9**, 478-483.
30. A. Sivanantham, P. Ganesan, S. Shanmugam, *Adv. Funct. Mater.*, 2016, **26**, 4661-4672.
